# Supplementary figures and images for: Elevated serum neurotensin and CRH levels in children with autistic spectrum disorders and tail-chasing Bull Terriers with a phenotype similar to autism
Source: PubMed Central journal article supplement — Transl Psychiatry. 2014 Oct 14;4(10):e466–. doi: 10.1038/tp.2014.106 (PMC5190146; doi:10.1038/tp.2014.106), 2014-10-14

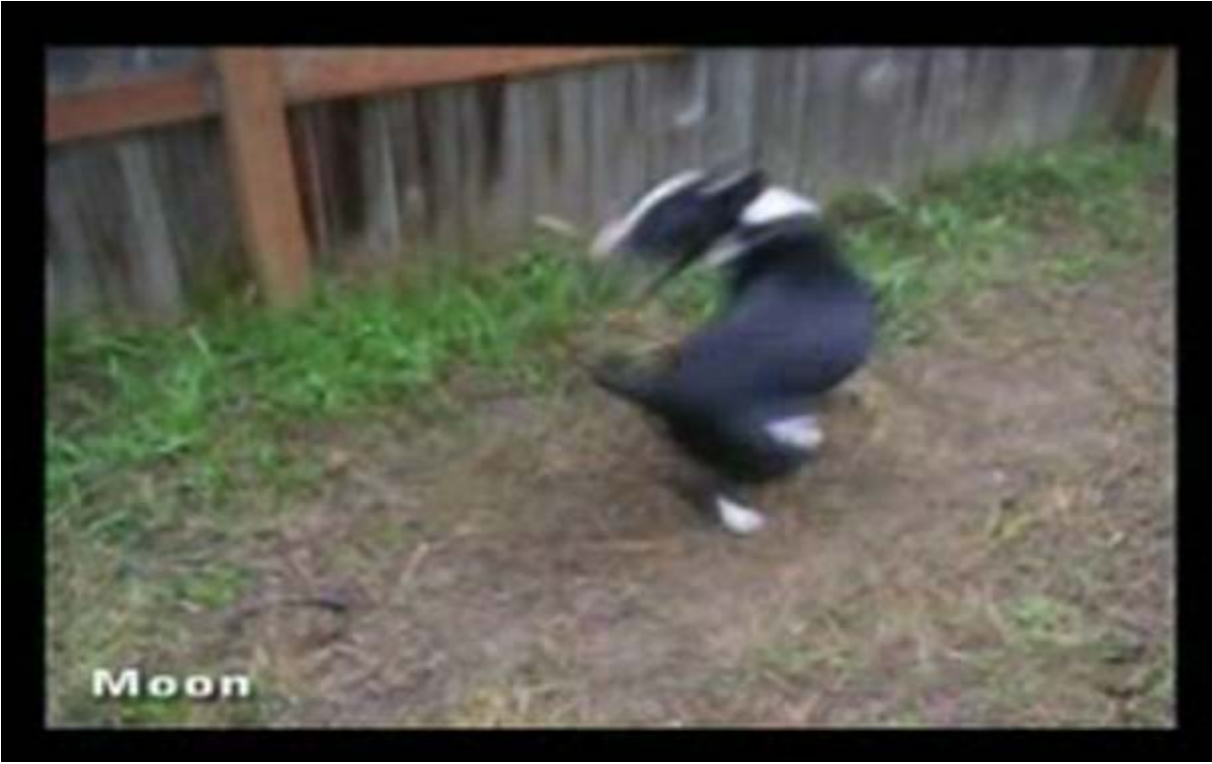

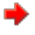

Supplement: tp2014106x1.pdf [file tp2014106x1.pdf]
